# Supplementary material
Source: PubMed Central journal article supplement (PMC6334646)
Supplement: NIHMS975870-supplement.pdf [file NIHMS975870-supplement.pdf]

## Supplemental Information

### Approved Anti-Cancer Drugs Target Oncogenic Non-Coding RNAs

Sai Pradeep Velagapudi<sup>1</sup>, Matthew G. Costales<sup>1</sup>, Balayeshwanth R. Vummidi<sup>1</sup>, Yoshio Nakai<sup>1</sup>, Alicia J. Angelbello<sup>1</sup>, Tuan Tran<sup>1</sup>, Hafeez S. Haniff<sup>1</sup>, Yasumasa Matsumoto<sup>1</sup>, Zi Fu Wang<sup>1</sup>, Arnab K. Chatterjee<sup>2</sup>, Jessica L. Childs-Disney<sup>1</sup>, and Matthew D. Disney<sup>1,3,\*</sup>

<sup>1</sup>Department of Chemistry, The Scripps Research Institute, 130 Scripps Way, Jupiter, FL 33458

<sup>2</sup>California Institute for Biomedical Research (CALIBR), 11119 North Torrey Pines Road, Suite 100, La Jolla, CA 92037

<sup>3</sup>Lead Contact

\*Correspondence: [Disney@scripps.edu](mailto:Disney@scripps.edu) (M.D.D.)

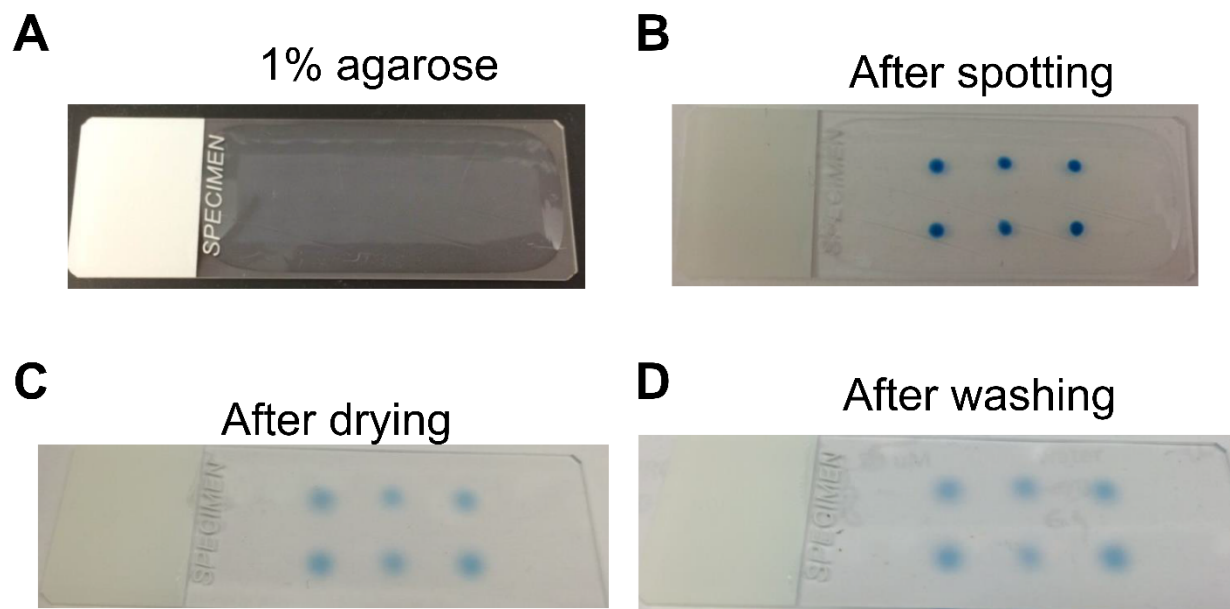

**Figure S1: AbsorbArray slide construction. Related to Figure 1.** **A**, image of 1% agarose slide [Fisher Scientific, 12550016; 75 x 25 x 1 mm (width x height x thickness)]. **B**, image of a glass slide after spotting compound **3** into agarose gel surface. **C**, image of slide pinned with compound **3** after drying agarose into a thin film. **D**, image of slide after washing.

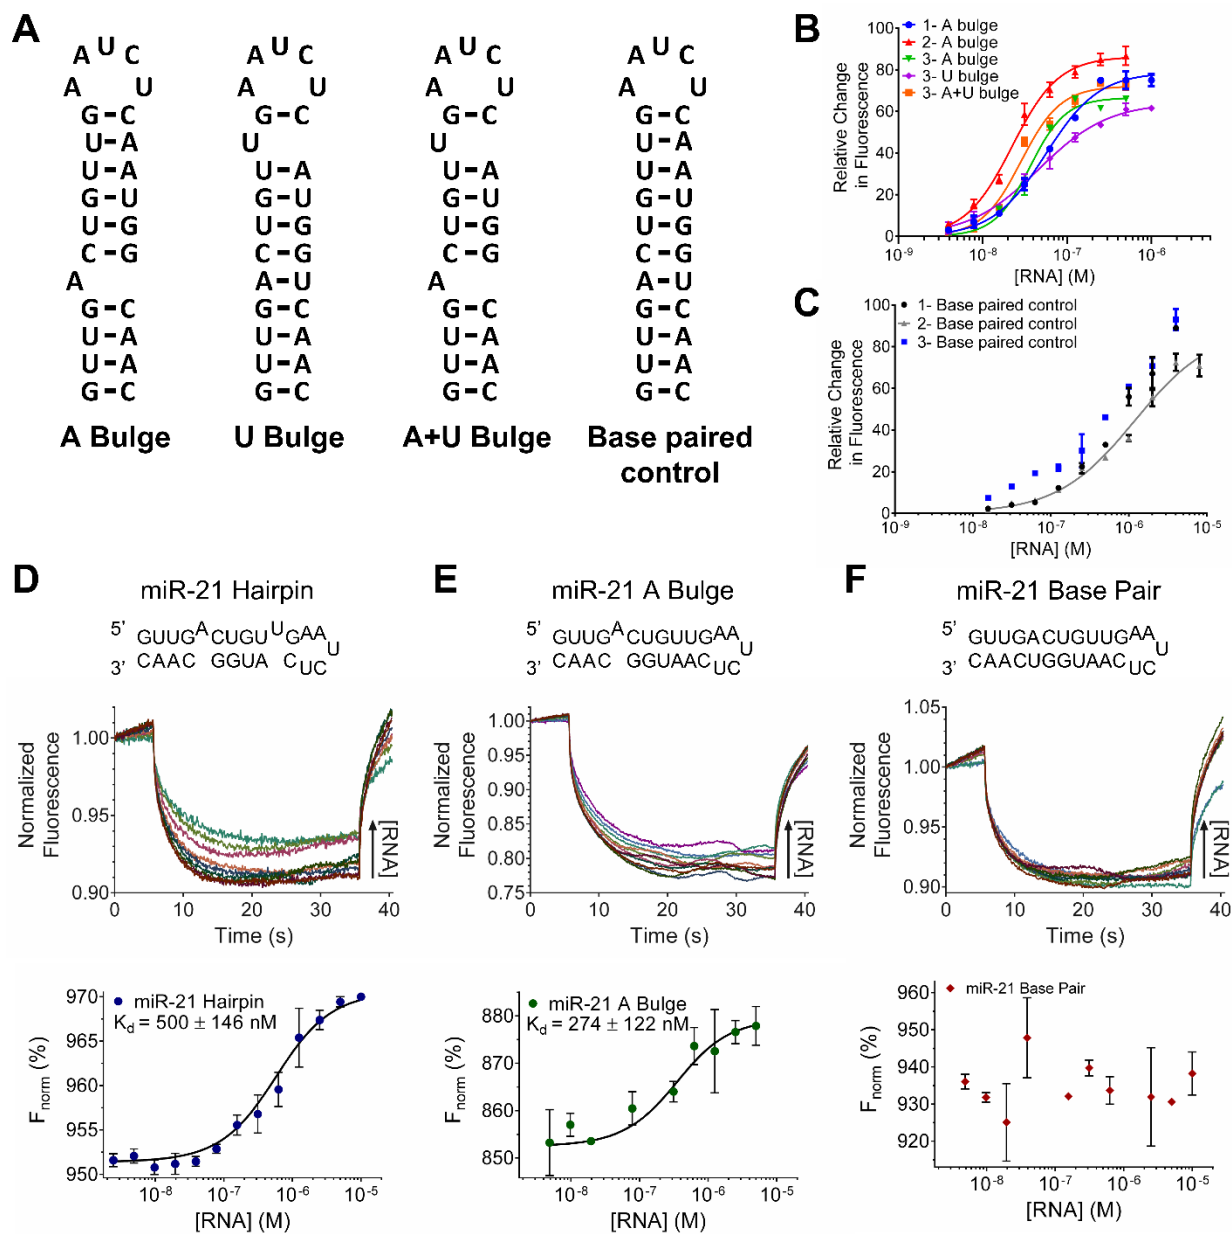

**Figure S2: Binding affinities of compounds to the A and U bulges in the miR-21 hairpin precursor. Related to Figure 2 and Table 2. A**, secondary structures of A bulge, U bulge, A+U bulge, and base-paired control used for studying binding affinities of topoisomerase inhibitors by fluorescence. **B**, representative fluorescent binding isotherms of compounds **1**, **2**, and **3** to RNAs containing an A bulge, U bulge, or an A+U bulge. **C**, representative fluorescent binding isotherms of compounds **1**, **2**, and **3** to a base-paired control RNA. **D**, microscale thermophoresis (MST) binding analyses of compound **3** to a RNA construct containing both the A and U bulge displayed

in the miR-21 hairpin precursor (miR-21 Hairpin Full); **E**, a RNA construct containing only the A bulge displayed in the miR-21 hairpin precursor (miR-21 A Bulge), and; **F**, a base paired control RNA construct (miR-21 Base Pair). Data represents mean  $\pm$  s.d.

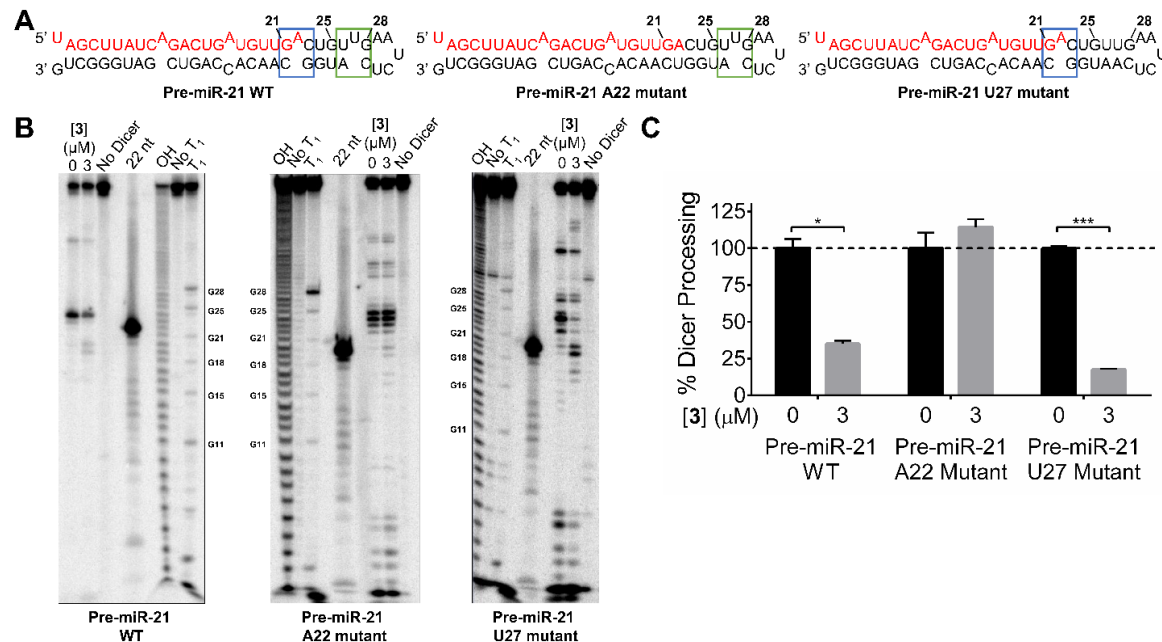

**Figure S3: *In vitro* Dicer processing of pre-miR-21 wild type and pre-miR-21 A22 mutant.**

**Related to Figure 2.** **A**, pre-miR-21 RNA constructs used in this study. Pre-miR-21 A22 Mutant is the same as the Pre-miR-21 WT, but with the A bulge base paired to a U. Pre-miR-21 U27 Mutant is the same as Pre-miR-21 WT, but with the U bulge base paired to an A. Blue boxes represent A bulge binding site, green boxes represent U bulge binding site, and red text represents mature miR-21 product. **B**, Representative gels of *in vitro* Dicer processing of Pre-miR-21 WT and Pre-miR-21 A22 mutant with compound **3**. **C**, quantification of the Dicer processing bands shown in **B**. Data represents mean  $\pm$  s.e.m. ( $n \geq 3$ ). \* indicates  $p < 0.5$ ; \*\*\* indicates  $p < 0.001$ , as determined by a two-tailed student t test.

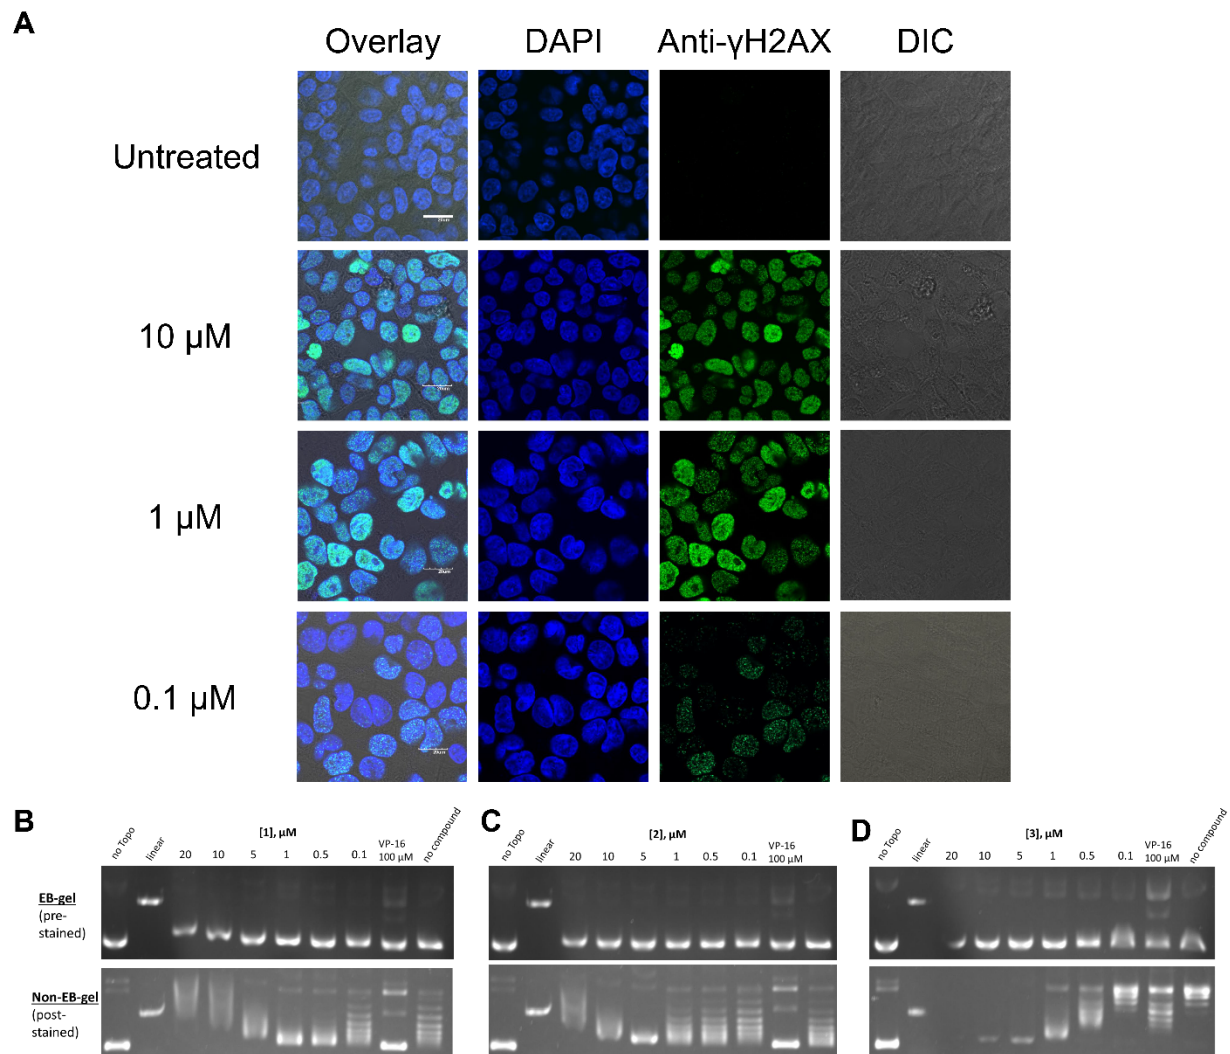

**Figure S4: Effect of compounds on DNA damage in MDA-MB-231 cells. Related to Figure 3.** **A**, representative images of DNA damage resulting from **3** treatment, as analyzed by staining for  $\gamma$ -H2AX foci. **B**, the effect of topoisomerase inhibitor compounds on topoisomerase activity as analyzed by an *in vitro* topoisomerase inhibition assay.

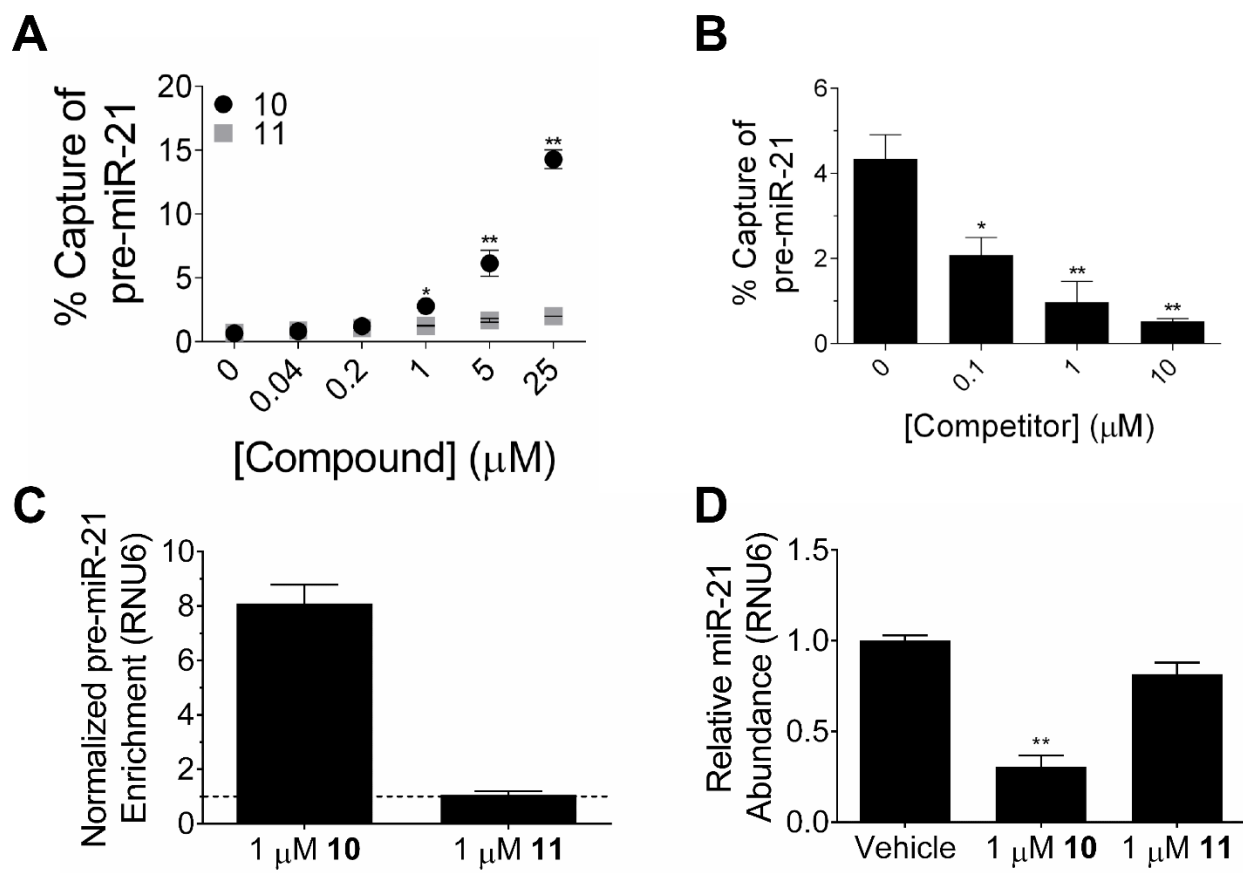

**Figure S5: Small molecule target validation in vitro and effects of Chem-CLIP compounds 10 and 11 in cells. Related to Figure 4. A**, in vitro Chem-CLIP of pre-miR-21. \* indicates  $p < 0.5$ ; \*\* indicates  $p < 0.01$ , when comparing percent capture by compound 10 to percent capture by compound 11, as determined by a two-tailed student t test. **B**, in vitro C-Chem-CLIP of pre-miR-21 by using increasing concentrations of 3 to compete with 10 for binding (1  $\mu\text{M}$ ). \* indicates  $p < 0.5$ ; \*\* indicates  $p < 0.01$ , when comparing percent capture with and without competitor, as determined by a two-tailed student t test. **C**, Chem-CLIP of pre-miR-21 using 1  $\mu\text{M}$  of 10 and 11 in MDA-MB-231 cells. **D**, mature miR-21 biogenesis is inhibited at 1  $\mu\text{M}$  of 10. \*\* indicates  $p < 0.01$ , when comparing treated to vehicle samples, as determined by a two-tailed student t test.

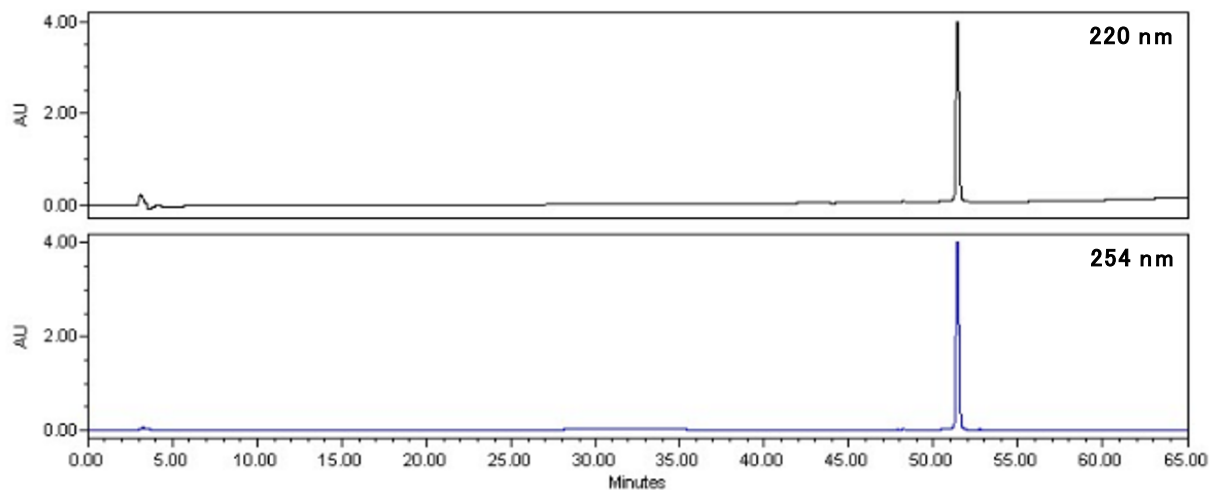

**Figure S6: Analytical HPLC trace of 10. Related to STAR Methods.** A linear gradient with a flow rate of 1 mL/min from 0% to 100% acetonitrile in H<sub>2</sub>O with 0.1% (v/v) TFA over 60 min was used.



**Table S1: Inforna search identifies topoisomerase inhibitors 2 and 3 can target miRNAs that are upregulated in cancers with high fitness score (>50). Related to Table 1.**

| Small Molecule | Target Site | miRNA        | Drosha/Dicer      | Cancer           |
|----------------|-------------|--------------|-------------------|------------------|
| <b>2</b>       | 5'CAG/3'CG  | hsa-miR-21   | Dicer             | multiple cancers |
| <b>3</b>       | 5'GCC/3'AU  | hsa-miR-487a | Dicer             | breast and liver |
| <b>3</b>       | 5'GCC/3'AUU | hsa-miR-106a | Dicer             | multiple cancers |
| <b>3</b>       | 5'UUA/3'CG  | hsa-miR-25   | Dicer             | multiple cancers |
| <b>3</b>       | 5'GCC/3'AAU | hsa-miR-23a  | Drosha            | breast and lung  |
| <b>3</b>       | 5'AGU/3'CGG | hsa-miR-661  | Drosha            | breast           |
| <b>3</b>       | 5'AGU/3'CGG | hsa-miR-27a  | Dicer             | breast           |
| <b>3</b>       | 5'CAG/3'CG  | hsa-miR-21   | Dicer             | multiple cancers |
| <b>3</b>       | 5'UUA/3'CG  | hsa-miR-21   | Adjacent to Dicer | multiple cancers |

| <b>Table S2: Sequences of primers used for RT-qPCR. Related to STAR Methods.</b> |                           |
|----------------------------------------------------------------------------------|---------------------------|
| hsa-miR-21                                                                       | TAGCTTATCAGACTGATGTTGA    |
| let-7e                                                                           | TGAGGTAGGAGGTTGTATAGTT    |
| hsa-miR-25                                                                       | CATTGCACTTGTCTCGGTCTGA    |
| hsa-miR-181b-2                                                                   | AACATTCATTGCTGTCGGTGGGT   |
| hsa-miR-449a                                                                     | TGGCAGTGTATTGTTAGCTGGT    |
| hsa-miR-555                                                                      | AGGGTAAGCTGAACCTCTGAT     |
| hsa-miR-3130                                                                     | GCTGCACCGGAGACTGGGTAA     |
| hsa-miR-3616                                                                     | CGAGGGCATTTCATGATGCAGGC   |
| hsa-miR-4739                                                                     | AAGGGAGGAGGAGCGGAGGGGCCCT |
| hsa-miR-4673                                                                     | TCCAGGCAGGAGCCGGACTGGA    |
| RNU6                                                                             | ACACGCAAATTCGTGAAGCGTTC   |
| Universal Reverse                                                                | GAATCGAGCACCAGTTACGC      |
| 18S-F                                                                            | GTAACCCGTTGAACCCATT       |
| 18S-R                                                                            | CCATCCAATCGGTAGTAGCG      |
| hsa-pre-miR-21-F                                                                 | CTGATGTTGACTGTTGAATC      |
| hsa-pre-miR-21-R                                                                 | GCCCATCGACTGGTGTGTC       |
